# Supplementary material for: Phase II trial of nivolumab and metformin in patients with treatment-refractory microsatellite stable metastatic colorectal cancer
Source: PubMed Central journal article supplement — J Immunother Cancer. 2023 Oct 18;11(10):e007235. doi: 10.1136/jitc-2023-007235 (PMC10603338; doi:10.1136/jitc-2023-007235), 2023-10-18
Supplement: jitc-2023-007235supp001.pdf [file jitc-2023-007235supp001.pdf]

| <b>Antibodies for Flow Cytometry</b> |                    |              |                         |                   |
|--------------------------------------|--------------------|--------------|-------------------------|-------------------|
| <b>Antibody</b>                      | <b>Fluorophore</b> | <b>Clone</b> | <b>Catalogue number</b> | <b>Vendor</b>     |
| CD3                                  | FITC               | UCHT1        | 300405                  | Biolegend         |
| CD4                                  | BV421              | RPA-T4       | 300531                  | Biolegend         |
| CD8                                  | PE/Cy7             | SK1          | 344711                  | Biolegend         |
| CCR7                                 | APC                | G043H7       | 353213                  | Biolegend         |
| CD56                                 | PE                 | MEM-188      | 304605                  | Biolegend         |
| CD137                                | PE/Dazzle 594      | 4B4-1        | 309825                  | Biolegend         |
| CD14                                 | APC                | M5E2         | 301807                  | Biolegend         |
| CD16                                 | FITC               | B73.1        | 360715                  | Biolegend         |
| HLA-DR                               | PE                 | L243         | 50-9952-T100            | Tonbo Biosciences |
| CD36                                 | PerCP/Cy5.5        | 5-271        | 336223                  | Biolegend         |
| CD68                                 | APC/Cy7            | Y1/82A       | 333821                  | Biolegend         |
| CD11b                                | PE/Cy7             | LM2          | 393103                  | Biolegend         |
| CD33                                 | PE/Dazzle 594      | WM53         | 303431                  | Biolegend         |
| CD163                                | BV421              | GHI/61       | 333611                  | Biolegend         |
| CD206                                | BV605              | 15-2         | 321139                  | Biolegend         |
| Mouse IgG1                           | BV605              | MOPC-21      | 400161                  | Biolegend         |
| Mouse IgG1                           | PE/Dazzle 594      | MOPC-21      | 400175                  | Biolegend         |
| Mouse IgG1                           | BV421              | MOPC-21      | 400157                  | Biolegend         |
