# Supplementary material for: Phase II trial of nivolumab and metformin in patients with treatment-refractory microsatellite stable metastatic colorectal cancer
Source: PubMed Central journal article supplement — J Immunother Cancer. 2023 Oct 18;11(10):e007235. doi: 10.1136/jitc-2023-007235 (PMC10603338; doi:10.1136/jitc-2023-007235), 2023-10-18
Supplement: jitc-2023-007235supp002.pdf [file jitc-2023-007235supp002.pdf]

| Populations                              | Metformin Only              |        |           |                              |        |         | Pre vs. Post-treatment (p-value) |
|------------------------------------------|-----------------------------|--------|-----------|------------------------------|--------|---------|----------------------------------|
|                                          | Pre-treatment samples (N=7) |        |           | Post-treatment samples (N=9) |        |         |                                  |
|                                          | Mean ± SD                   | Median | Range     | Mean ± SD                    | Median | Range   |                                  |
| <b>AMPK<sup>+</sup> cells</b>            | 28 ± 19                     | 29     | 51- 4     | 43 ± 16                      | 41     | 76 - 26 | 0.886                            |
| <b>Tumour cells</b>                      | 18 ± 7                      | 17     | 31- 1     | 26 ± 18                      | 22     | 58 - 2  | 0.468                            |
| AMPK <sup>+</sup>                        | 55 ± 33                     | 7      | 88 - 12   | 69 ± 17                      | 67     | 97- 49  | 0.688                            |
| PDL1 <sup>+</sup>                        | 30 ± 30                     | 22     | 86- 4     | 17 ± 15                      | 12     | 43- 0   | 0.375                            |
| <b>PDL1<sup>-</sup> Tim3<sup>+</sup></b> | 7 ± 4                       | 9      | 12.0- 1   | 7 ± 4                        | 6      | 15- 2   | 0.938                            |
| <b>Leukocytes</b>                        | 25 ± 10                     | 25     | 39- 10    | 18 ± 10                      | 16     | 37- 5   | 0.375                            |
| AMPK <sup>+</sup>                        | 36 ± 31                     | 25     | 71- 2     | 44 ± 24                      | 38     | 82- 14  | 0.688                            |
| PDL1 <sup>+</sup>                        | 16 ± 31                     | 5      | 86- 0     | 2 ± 2                        | 2      | 5.0- 0  | 0.156                            |
| Helper T cells                           | 7 ± 3                       | 8      | 12.0- 3   | 6 ± 4                        | 6      | 14 - 2  | 0.578                            |
| Cytotoxic T cells                        | 2 ± 3                       | 1      | 8.0- 0    | 2 ± 1                        | 1      | 4.0 - 0 | 0.578                            |
| Regulatory T cells                       | 1 ± 1                       | 1      | 2.0- 0    | 1 ± 1                        | 0      | 2.0 - 0 | 0.938                            |
| CD4 <sup>+</sup> T cells                 |                             |        |           |                              |        |         |                                  |
| Naïve                                    | 3 ± 2                       | 3.00   | 7.0 - 1.0 | 1 ± 1                        | 1.00   | 5.0 - 0 | 0.219                            |
| Central Memory                           | 3 ± 2                       | 3.00   | 7.0- 1    | 3 ± 4                        | 2      | 12.0- 1 | 0.938                            |
| Effector                                 | 1 ± 0                       | 1      | 2.0- 0    | 0 ± 0                        | 0.00   | 1.0- 0  | 0.031                            |
| Effector Memory                          | 1 ± 1                       | 0.00   | 2.0 - 0   | 1 ± 1                        | 1.00   | 2.0 - 0 | 0.844                            |
| CD8 <sup>+</sup> T cells                 |                             |        |           |                              |        |         |                                  |
| Naïve                                    | 1 ± 2                       | 1.00   | 5.0- 0    | 0 ± 0                        | 0.00   | 1.0- 0  | 0.375                            |
| Central Memory                           | 1 ± 1                       | 1.00   | 3.0- 0    | 1 ± 1                        | 1.00   | 3.0- 0  | 0.375                            |
| Effector                                 | 0                           | 0.00   | 0         | 0                            | 0.00   | 0       | 0.188                            |
| Effector Memory                          | 0                           | 0.00   | 0         | 0                            | 0.00   | 0       | 0.563                            |
| Exhausted T cells                        | 0                           | 0.00   | 0         | 0                            | 0.00   | 0       | 0.188                            |
| NK cells                                 | 0                           | 0.00   | 1.0 - 0   | 0                            | 0.00   | 1.0 - 0 | 0.469                            |

**Table S2.** Immune cell populations in patients treated with metformin only as determined by ChipCytometry analysis. Data for AMPK<sup>+</sup>, tumor and PDL1<sup>-</sup>Tim3<sup>+</sup> cell populations and leukocyte cell populations are expressed as percent of all cells. Data for leukocyte cell populations are represented as percent of leukocytes (CD45<sup>+</sup>). Data for CD4<sup>+</sup> T cell populations are represented as percent of CD4<sup>+</sup> T cells, and CD8<sup>+</sup> T cells populations as percent of CD8<sup>+</sup> T cells.

| Populations                              | Metformin + Nivolumab       |        |         |                              |        |          | Pre vs. Post-treatment (p-value) |
|------------------------------------------|-----------------------------|--------|---------|------------------------------|--------|----------|----------------------------------|
|                                          | Pre-treatment samples (N=7) |        |         | Post-treatment samples (N=7) |        |          |                                  |
|                                          | Mean ± SD                   | Median | Range   | Mean ± SD                    | Median | Range    |                                  |
| <b>AMPK<sup>+</sup> cells</b>            | 37 ± 17                     | 4      | 58 - 11 | 44 ± 21                      | 49     | 67 - 8   | 0.688                            |
| <b>Tumor cells</b>                       | 34 ± 11                     | 31     | 47 - 14 | 24 ± 20                      | 21     | 59 - 0   | 0.219                            |
| AMPK <sup>+</sup>                        | 64 ± 28                     | 7      | 90 - 17 | 70 ± 0.35                    | 0.85   | 0.92 - 0 | 0.688                            |
| PDL1 <sup>+</sup>                        | 9 ± 9                       | 6      | 21 - 1  | 14 ± 18                      | 10     | 47 - 0   | 0.688                            |
| <b>PDL1<sup>-</sup> Tim3<sup>+</sup></b> | 10 ± 7                      | 8      | 25 - 4  | 14 ± 7                       | 12     | 28 - 7   | 0.031                            |
| <b>Leukocytes</b>                        | 12 ± 5                      | 11     | 19 - 6  | 23 ± 14                      | 17     | 44 - 11  | 0.031                            |
| AMPK <sup>+</sup>                        | 34 ± 16                     | 39     | 49 - 5  | 48 ± 21                      | 50     | 80 - 19  | 0.563                            |
| PDL1 <sup>+</sup>                        | 4 ± 6                       | 2      | 15 - 1  | 6 ± 4                        | 5      | 11.0 - 0 | 0.438                            |
| Helper T cells                           | 5 ± 1                       | 5      | 7.0 - 4 | 10 ± 8                       | 7      | 21 - 3   | 0.156                            |
| Cytotoxic T cells                        | 1 ± 1                       | 1      | 2.0 - 0 | 1 ± 1                        | 1      | 4.0 - 0  | 0.156                            |
| Regulatory T cells                       | 1 ± 0                       | 0      | 1.0 - 0 | 1 ± 1                        | 1      | 3.0 - 0  | 0.688                            |
| CD4 <sup>+</sup> T cells                 |                             |        |         |                              |        |          |                                  |
| Naïve                                    | 1 ± 1                       | 1.00   | 3.0 - 0 | 3.0 ± 3                      | 2.00   | 10.0 - 0 | 0.313                            |
| Central Memory                           | 3 ± 1                       | 3.00   | 4.0 - 2 | 5 ± 4                        | 3      | 11.0 - 0 | 0.313                            |
| Effector                                 | 0 ± 0                       | 0      | 1.0 - 0 | 1 ± 1                        | 1.00   | 2.0 - 0  | 0.063                            |
| Effector Memory                          | 0 ± 0                       | 1.00   | 1.0 - 0 | 1 ± 1                        | 0.00   | 3.0 - 0  | 0.563                            |
| CD8 <sup>+</sup> T cells                 |                             |        |         |                              |        |          |                                  |
| Naïve                                    | 0 ± 0                       | 0.00   | 1.0 - 0 | 0 ± 0                        | 0.00   | 1.0 - 0  | 0.688                            |
| Central Memory                           | 1 ± 0                       | 0.00   | 1.0 - 0 | 1 ± 1                        | 1.00   | 3.0 - 0  | 0.313                            |
| Effector                                 | 0                           | 0.00   | 0       | 0                            | 0.00   | 0        | 0.25                             |
| Effector Memory                          | 0                           | 0.00   | 0       | 0                            | 0.00   | 0        | 0.125                            |
| Exhausted T cells                        | 0                           | 0.00   | 1.0-0   | 0                            | 0.00   | 0        | 0.625                            |
| NK cells                                 | 0                           | 0.00   | 1.0 - 0 | 0 ± 1                        | 0.00   | 2.0 - 0  | 0.625                            |

**Table S3.** Immune cell populations in patients treated with metformin plus nivolumab as determined by ChipCytometry analysis. Data for AMPK<sup>+</sup>, tumor and PDL1<sup>-</sup> Tim3<sup>+</sup> cell populations and leukocytes cell populations are expressed as percent of all cells. Data for leukocyte cell populations are represented as percent of leukocytes (CD45<sup>+</sup>). Data for CD4<sup>+</sup> T cell populations are represented as percent of CD4<sup>+</sup> T cells, and CD8<sup>+</sup> T cells populations as percent of CD8<sup>+</sup> T cells.

| Populations                                 | Pre-treatment (N=17) |        |          | C1D1 (N=17) |        |          | C1D15 (N=17) |        |         | ETO       |        |         | Pre-treatment versus C1D1 (p value) | Pre-treatment versus C1D15 (p value) | Pre-treatment versus EOT (p value) |
|---------------------------------------------|----------------------|--------|----------|-------------|--------|----------|--------------|--------|---------|-----------|--------|---------|-------------------------------------|--------------------------------------|------------------------------------|
|                                             | Mean ± SD            | Median | Range    | Mean ± SD   | Median | Range    | Mean ± SD    | Median | Range   | Mean ± SD | Median | Range   |                                     |                                      |                                    |
| <b>CD3<sup>+</sup> cells</b>                | 43 ± 18              | 47     | 75 - 11  | 45 ± 20     | 49     | 79 - 13  | 41 ± 15      | 43     | 64 - 19 | 36 ± 20   | 40     | 76 - 9  | 0.0608                              | 0.7393                               | 0.4052                             |
| CD4 <sup>+</sup> T cells                    | 61 ± 12              | 62     | 86 - 38  | 57 ± 10     | 59     | 73 - 36  | 59 ± 8       | 61     | 69 - 38 | 61 ± 11   | 6      | 76 - 46 | 0.3406                              | 0.1709                               | 0.2525                             |
| <i>Naïve</i>                                | 28 ± 22              | 22     | 97 - 9   | 28 ± 21     | 21     | 94 - 9   | 26 ± 22      | 20     | 96 - 8  | 30 ± 19   | 25     | 65 - 10 | 0.6178                              | 0.4036                               | 0.9138                             |
| <i>Central Memory</i>                       | 49 ± 20              | 5      | 83 - 1   | 48 ± 20     | 47     | 81 - 3   | 54 ± 19      | 52     | 86 - 21 | 51 ± 17   | 51     | 84 - 30 | 0.3505                              | 0.294                                | 0.3161                             |
| <i>Effector</i>                             | 2 ± 3                | 1      | 11.0 - 0 | 2 ± 3       | 1      | 12.0 - 0 | 2 ± 2        | 1      | 9.0 - 0 | 1 ± 1     | 0      | 4.0 - 0 | 0.2133                              | 0.0316                               | 0.8371                             |
| <i>Effector Memory</i>                      | 22 ± 17              | 23     | 55.0 - 0 | 22 ± 17     | 20     | 52 - 0   | 21 ± 16      | 21     | 46 - 0  | 17 ± 17   | 13     | 43 - 0  | 0.6897                              | 0.2733                               | 0.6605                             |
| CD137 <sup>+</sup> CD4 <sup>+</sup> T cells | 2 ± 1                | 2      | 3.0 - 0  | 2 ± 1       | 1.00   | 4.0 - 1  | 2 ± 1        | 2      | 4.0 - 1 | 3 ± 1     | 3      | 5.0 - 1 | 0.5668                              | 0.3684                               | 0.0562                             |
| CD8 <sup>+</sup> T cells                    | 31 ± 11              | 28     | 51 - 18  | 28 ± 10     | 28.00  | 51 - 14  | 28 ± 9       | 26     | 52 - 16 | 22 ± 7    | 22     | 32 - 9  | 0.0789                              | 0.2506                               | 0.1189                             |
| <i>Naïve</i>                                | 38 ± 19              | 37     | 75 - 5   | 34 ± 21     | 28.00  | 82 - 4   | 29 ± 18      | 2      | 70 - 4  | 33 ± 18   | 30     | 66 - 11 | 0.3251                              | 0.0812                               | 0.0475                             |
| <i>Central Memory</i>                       | 21 ± 18              | 16     | 64 - 0   | 22 ± 18     | 18.00  | 71 - 0   | 20 ± 16      | 13     | 51 - 0  | 28 ± 20   | 25     | 68 - 6  | 0.9569                              | 0.4758                               | 0.4601                             |
| <i>Effector</i>                             | 23 ± 18              | 19     | 57 - 2   | 23 ± 19     | 17.00  | 63 - 2   | 21 ± 16      | 15     | 52 - 3  | 16 ± 12   | 13     | 44 - 3  | 0.192                               | 0.203                                | 0.1853                             |
| <i>Effector Memory</i>                      | 18 ± 13              | 17     | 50 - 0   | 21 ± 15     | 23.00  | 61 - 2   | 23 ± 20      | 21     | 76 - 1  | 24 ± 22   | 18     | 69 - 2  | 0.1529                              | 0.6184                               | 0.0973                             |
| CD137 <sup>+</sup> CD8 <sup>+</sup> T cells | 2 ± 1                | 2      | 3.0 - 1  | 2 ± 1       | 2.00   | 4.0 - 1  | 2 ± 2        | 2      | 8.0 - 1 | 2 ± 2     | 2      | 9.0 - 0 | 0.7625                              | 0.6122                               | 0.4642                             |

**Table S4.** Immune cell populations in PBMCs of patients treated with metformin then metformin plus nivolumab at various time points. Data for CD3<sup>+</sup> cell populations are represented as percent of all cells. Data for CD4<sup>+</sup> and CD8<sup>+</sup> T cell populations are represented as percent of CD3<sup>+</sup> T cells.

| Immune Marker, mean ( $\pm$ SD)          | Pre-treatment comparisons        |                            | Post-treatment comparisons       |                            | Difference Post - Pre            |                            |
|------------------------------------------|----------------------------------|----------------------------|----------------------------------|----------------------------|----------------------------------|----------------------------|
|                                          | Progressive Disease (PD) (n= 12) | Stable Disease (SD) (n =2) | Progressive Disease (PD) (n= 14) | Stable Disease (SD) (n =2) | Progressive Disease (PD) (n= 11) | Stable Disease (SD) (n =2) |
| AMPK <sup>+</sup> cells                  | 0.333(0.175)                     | 0.259(0.285)               | 0.447(0.186)                     | 0.334(0.108)               | 0.107 (0.312)                    | 0.075 (0.177)              |
| Tumor cells                              | 0.283(0.119)                     | 0.132(0.038)               | 0.261(0.193)                     | 0.173(0.066)               | -0.028 (0.2)                     | 0.042 (0.028)              |
| PDL1 <sup>+</sup> Tim3 <sup>+</sup>      | 0.085(0.058)                     | 0.086(0.051)               | 0.098(0.067)                     | 0.104(0.058)               | 0.038 (0.066)                    | 0.018 (0.007)              |
| Leukocytes                               | 0.177(0.108)                     | 0.221(0.082)               | 0.203(0.119)                     | 0.206(0.115)               | 0.052 (0.171)                    | -0.014 (0.198)             |
| Helper T cells                           | 0.064(0.027)                     | 0.06(0.04)                 | 0.074(0.062)                     | 0.096(0.063)               | 0.022 (0.073)                    | 0.036 (0.104)              |
| Cytotoxic T cells                        | 0.017(0.022)                     | 0.008(0)                   | 0.014(0.012)                     | 0.02(0.009)                | -0.002 (0.026)                   | 0.012 (0.009)              |
| Regulatory T cells                       | 0.008(0.006)                     | 0.003(0.003)               | 0.007(0.008)                     | 0.013(0.001)               | 0 (0.012)                        | 0.009 (0.004)              |
| Naïve CD4 <sup>+</sup> T cells           | 0.021(0.011)                     | 0.034(0.044)               | 0.021(0.027)                     | 0.019(0.002)               | 0.005 (0.034)                    | -0.015 (0.043)             |
| Central Memory CD4 <sup>+</sup> T cells  | 0.031(0.016)                     | 0.017(0.013)               | 0.038(0.036)                     | 0.069(0.068)               | 0.014 (0.039)                    | 0.052 (0.055)              |
| Effector CD4 <sup>+</sup> T cells        | 0.005(0.004)                     | 0.006(0.008)               | 0.005(0.006)                     | 0.003(0.004)               | -0.001 (0.006)                   | -0.003 (0.005)             |
| Effector Memory CD4 <sup>+</sup> T cells | 0.007(0.006)                     | 0.003(0.001)               | 0.01(0.011)                      | 0.005(0)                   | 0.004 (0.011)                    | 0.002 (0.001)              |
| Naïve CD8 <sup>+</sup> T cells           | 0.009(0.014)                     | 0.005(0.003)               | 0.004(0.003)                     | 0.006(0.002)               | -0.005 (0.015)                   | 0.001 (0.001)              |
| Central Memory CD8 <sup>+</sup> T cells  | 0.008(0.008)                     | 0.003(0.003)               | 0.009(0.01)                      | 0.015(0.011)               | 0.003 (0.013)                    | 0.012 (0.008)              |
| Effector CD8 <sup>+</sup> T cells        | 0(0)                             | 0(0)                       | 0(0.001)                         | 0(0)                       | 0 (0)                            | 0 (0)                      |
| Effector Memory CD8 <sup>+</sup> T cells | 0(0)                             | 0(0)                       | 0(0.001)                         | 0(0)                       | 0 (0.001)                        | 0 (0)                      |
| Exhausted T cells                        | 0.001(0.002)                     | 0.001(0.001)               | 0.001(0.001)                     | 0.002(0.003)               | 0 (0.001)                        | 0.001 (0.002)              |
| NK cells                                 | 0.002(0.003)                     | 0.006(0.008)               | 0.003(0.006)                     | 0.008(0.006)               | 0.001 (0.007)                    | 0.002 (0.002)              |
| AMPK <sup>+</sup> tumor cells            | 0.608(0.277)                     | 0.499(0.535)               | 0.714(0.276)                     | 0.579(0.129)               | 0.106 (0.452)                    | 0.08 (0.405)               |
| PDL1 <sup>+</sup> tumor cells            | 0.159(0.148)                     | 0.451(0.582)               | 0.153(0.167)                     | 0.162(0.069)               | -0.055 (0.108)                   | -0.289 (0.65)              |
| AMPK <sup>+</sup> leukocytes             | 0.344(0.228)                     | 0.39(0.446)                | 0.478(0.231)                     | 0.349(0.038)               | 0.145 (0.364)                    | -0.041 (0.408)             |
| PDL1 <sup>+</sup> leukocytes             | 0.045(0.047)                     | 0.431(0.61)                | 0.039(0.036)                     | 0.031(0.024)               | -0.013 (0.05)                    | -0.4 (0.585)               |

**Table S5.** Clinical correlates for tissues of patients treated with metformin or metformin plus nivolumab

| Immune Marker, mean (±SD)                                | Pre-treatment comparisons       |                           | C1D1 comparisons                |                           | C1D15 comparisons               |                           | EOT comparisons                |                           | Difference C1D15- Pre Screening |                           |
|----------------------------------------------------------|---------------------------------|---------------------------|---------------------------------|---------------------------|---------------------------------|---------------------------|--------------------------------|---------------------------|---------------------------------|---------------------------|
|                                                          | Progressive Disease (PD) (n=15) | Stable Disease (SD) (n=2) | Progressive Disease (PD) (n=15) | Stable Disease (SD) (n=2) | Progressive Disease (PD) (n=13) | Stable Disease (SD) (n=2) | Progressive Disease (PD) (n=9) | Stable Disease (SD) (n=2) | Progressive Disease (PD) (n=13) | Stable Disease (SD) (n=2) |
| CD3 <sup>+</sup> cells (% of all cells)                  | 0.427(0.192)                    | 0.46(0.132)               | 0.44(0.21)                      | 0.557(0.123)              | 0.418(0.162)                    | 0.384(0.049)              | 0.344(0.218)                   | 0.427(0.044)              | 0.011 (0.139)                   | -0.076 (0.059)            |
| CD4 <sup>+</sup> cells (%of CD3 cells)                   | 0.61(0.123)                     | 0.584(0.058)              | 0.566(0.094)                    | 0.62(0.159)               | 0.589(0.074)                    | 0.6(0.128)                | 0.596(0.106)                   | 0.664(0.135)              | -0.018 (0.108)                  | 0.016 (0.05)              |
| Central Memory CD4 <sup>+</sup> T cells (%CD4)           | 0.464(0.191)                    | 0.648(0.258)              | 0.464(0.19)                     | 0.633(0.255)              | 0.521(0.174)                    | 0.639(0.315)              | 0.484(0.142)                   | 0.639(0.279)              | 0.054 (0.098)                   | -0.009 (0.041)            |
| Naïve CD4 <sup>+</sup> T cells (%CD4)                    | 0.287(0.228)                    | 0.211(0.073)              | 0.283(0.227)                    | 0.252(0.129)              | 0.272(0.229)                    | 0.21(0.178)               | 0.311(0.199)                   | 0.272(0.181)              | -0.032 (0.062)                  | 0 (0.075)                 |
| Effector CD4 <sup>+</sup> T cells (%CD4)                 | 0.018(0.027)                    | 0.021(0.027)              | 0.017(0.029)                    | 0.017(0.018)              | 0.017(0.025)                    | 0.02(0.022)               | 0.01(0.012)                    | 0.013(0.015)              | 0.006 (0.024)                   | -0.001 (0.004)            |
| Effector Memory CD4 <sup>+</sup> T cells (%CD4)          | 0.232(0.176)                    | 0.121(0.158)              | 0.239(0.172)                    | 0.089(0.119)              | 0.22(0.166)                     | 0.133(0.113)              | 0.196(0.174)                   | 0.071(0.089)              | 0.001 (0.057)                   | 0.012 (0.032)             |
| CD137 <sup>+</sup> CD4 <sup>+</sup> T cells (%CD4)       | 0.017(0.007)                    | 0.015(0.009)              | 0.016(0.008)                    | 0.026(0.001)              | 0.018(0.006)                    | 0.028(0.017)              | 0.03(0.014)                    | 0.015(0.007)              | 0.001 (0.011)                   | 0.013 (0.006)             |
| CD8 <sup>+</sup> cells (%CD3 cells)                      | 0.297(0.111)                    | 0.405(0.116)              | 0.273(0.099)                    | 0.323(0.132)              | 0.275(0.092)                    | 0.311(0.087)              | 0.214(0.072)                   | 0.255(0.095)              | -0.033 (0.091)                  | -0.095 (0.021)            |
| Central Memory CD8 <sup>+</sup> T cells (%CD8 cells)     | 0.211(0.176)                    | 0.24(0.235)               | 0.219(0.192)                    | 0.212(0.179)              | 0.201(0.158)                    | 0.196(0.198)              | 0.286(0.204)                   | 0.23(0.234)               | 0.014 (0.072)                   | -0.044 (0.026)            |
| Naïve CD8 <sup>+</sup> T cells (%CD8 cells)              | 0.39(0.191)                     | 0.272(0.169)              | 0.348(0.223)                    | 0.26(0.033)               | 0.302(0.195)                    | 0.194(0.005)              | 0.352(0.185)                   | 0.232(0.135)              | -0.118 (0.195)                  | -0.078 (0.116)            |
| Effector CD8 <sup>+</sup> T cells (%CD8 cells)           | 0.22(0.168)                     | 0.318(0.281)              | 0.217(0.193)                    | 0.307(0.194)              | 0.198(0.166)                    | 0.283(0.194)              | 0.132(0.086)                   | 0.27(0.238)               | -0.01 (0.063)                   | -0.036 (0.062)            |
| Effector Memory CD8 <sup>+</sup> T cells (%CD8 cells)    | 0.178(0.139)                    | 0.171(0.122)              | 0.21(0.165)                     | 0.221(0.017)              | 0.217(0.21)                     | 0.329(0.008)              | 0.23(0.244)                    | 0.27(0.131)               | 0.033 (0.206)                   | 0.158 (0.081)             |
| CD137 <sup>+</sup> CD8 <sup>+</sup> T cells (%CD8 cells) | 0.016(0.005)                    | 0.015(0.007)              | 0.015(0.009)                    | 0.023(0.01)               | 0.016(0.008)                    | 0.051(0.048)              | 0.023(0.024)                   | 0.025(0.004)              | 0 (0.005)                       | 0.036 (0.029)             |

**Table S6.** Clinical correlates for PBMS of patients treated with metformin then metformin plus nivolumab
